# Supplementary material for: An Epigenetic Signature in Peripheral Blood Associated with the Haplotype on 17q21.31, a Risk Factor for Neurodegenerative Tauopathy
Source: PubMed Central journal article supplement (PMC3945475; doi:10.1371/journal.pgen.1004211), 2014-03-06
Supplement: pgen.1004211.s002.pdf [file pgen.1004211.s002.pdf]

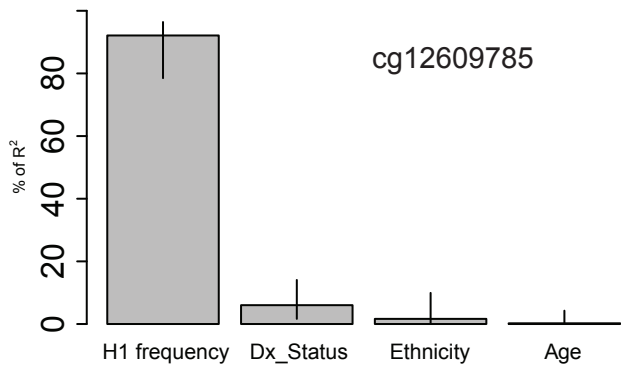

$R^2 = 62.35\%$ , metrics are normalized to sum 100%.

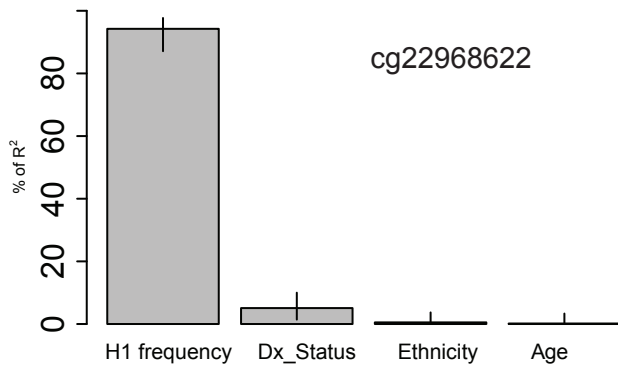

$R^2 = 85.5\%$ , metrics are normalized to sum 100%.

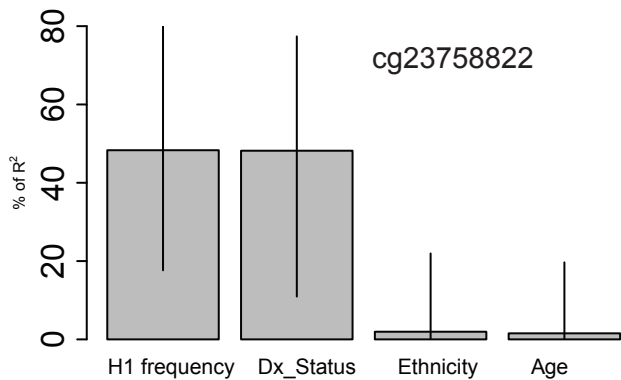

$R^2 = 16.56\%$ , metrics are normalized to sum 100%.
