# Supplementary material for: An Epigenetic Signature in Peripheral Blood Associated with the Haplotype on 17q21.31, a Risk Factor for Neurodegenerative Tauopathy
Source: PubMed Central journal article supplement (PMC3945475; doi:10.1371/journal.pgen.1004211), 2014-03-06

**1 – H2/H2 Control**

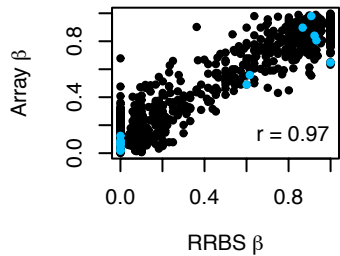

**2 – H1/H2 Control**

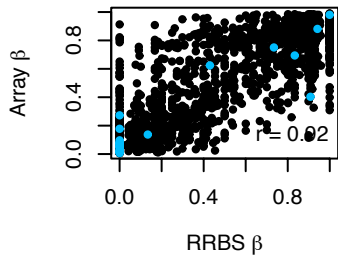

**3 – H1/H1 PSP**

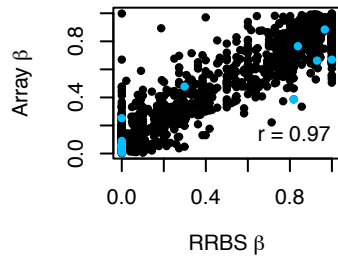

**4 – H1/H2 PSP**

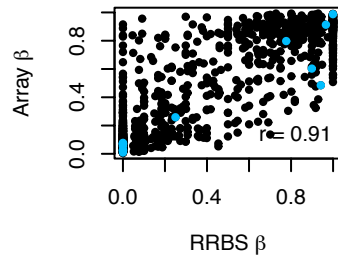

**5 – H1/H1 Control**

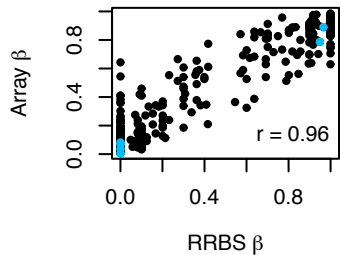

**6 – H1/H1 Control**

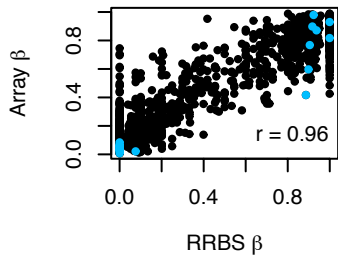

**7 – H2/H2 Control**

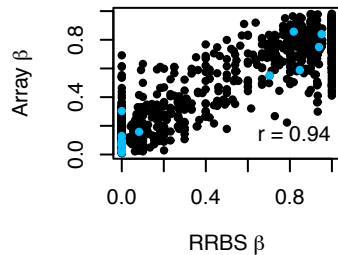

Supplement: pgen.1004211.s005.pdf [file pgen.1004211.s005.pdf]
