# Supplementary material for: An Epigenetic Signature in Peripheral Blood Associated with the Haplotype on 17q21.31, a Risk Factor for Neurodegenerative Tauopathy
Source: PubMed Central journal article supplement (PMC3945475; doi:10.1371/journal.pgen.1004211), 2014-03-06

**Dataset 1**

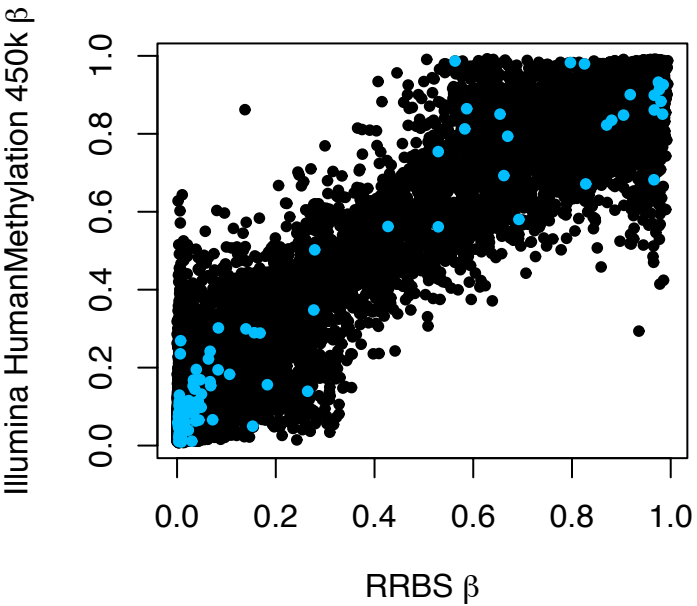

**Dataset 2**

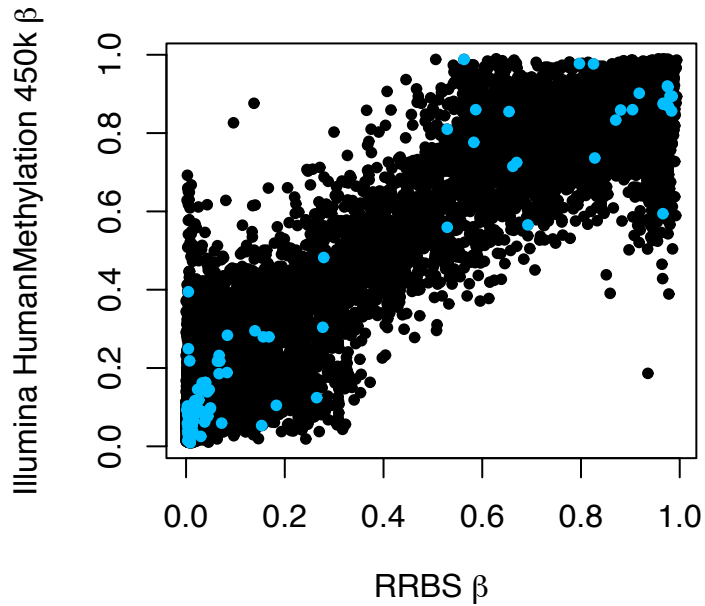

Supplement: pgen.1004211.s006.pdf [file pgen.1004211.s006.pdf]
