# Supplementary material for: An Epigenetic Signature in Peripheral Blood Associated with the Haplotype on 17q21.31, a Risk Factor for Neurodegenerative Tauopathy
Source: PubMed Central journal article supplement (PMC3945475; doi:10.1371/journal.pgen.1004211), 2014-03-06

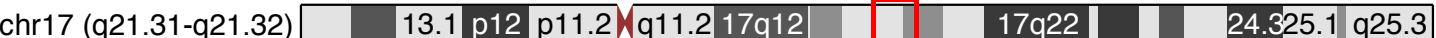

17q21.31 Inversion Region and 1 Mb Flanking

Human Mar. 2006 (NCBI36/hg18) chr17:39,899,921-42,989,253 (3,089,333 bp)

Window Position

Scale

1 Mb hg18

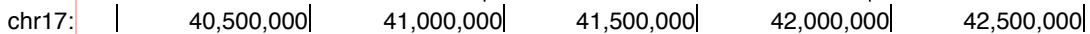

H1/H2 Methylation Differences

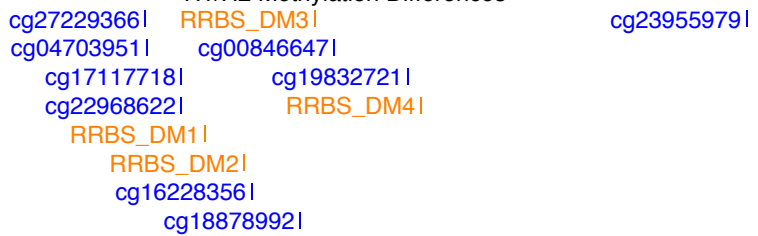

UCSC Genes (RefSeq, GenBank, tRNAs & Comparative Genomics)

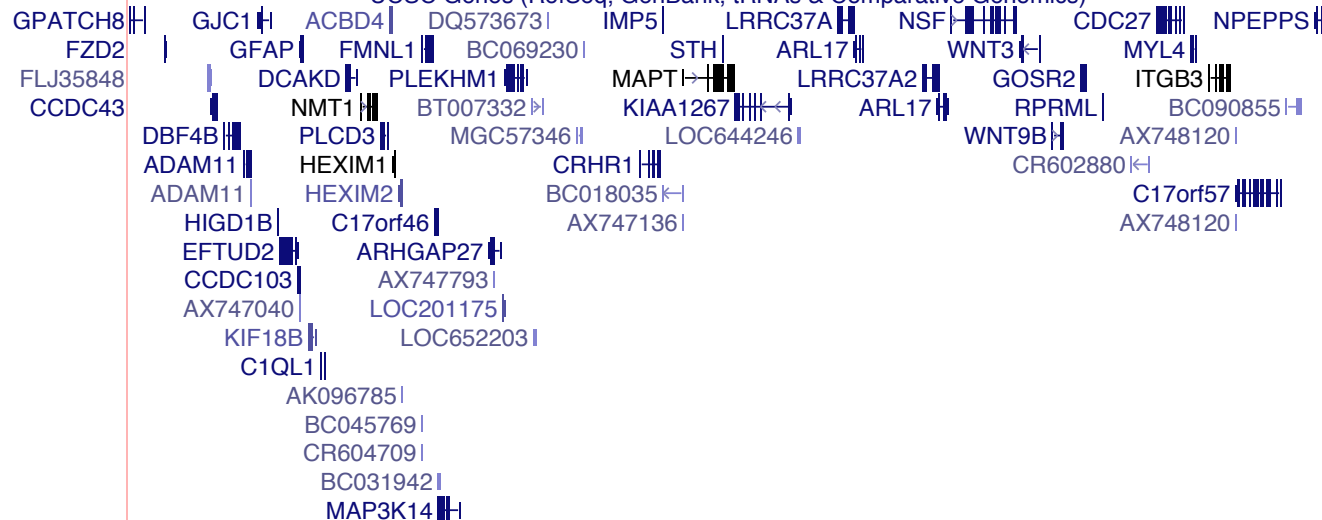

Chromosome Bands Localized by FISH Mapping Clones

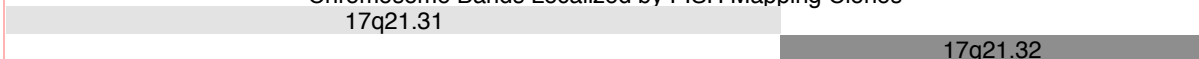

Supplement: pgen.1004211.s007.pdf [file pgen.1004211.s007.pdf]
