# Supplementary material for: An Epigenetic Signature in Peripheral Blood Associated with the Haplotype on 17q21.31, a Risk Factor for Neurodegenerative Tauopathy
Source: PubMed Central journal article supplement (PMC3945475; doi:10.1371/journal.pgen.1004211), 2014-03-06

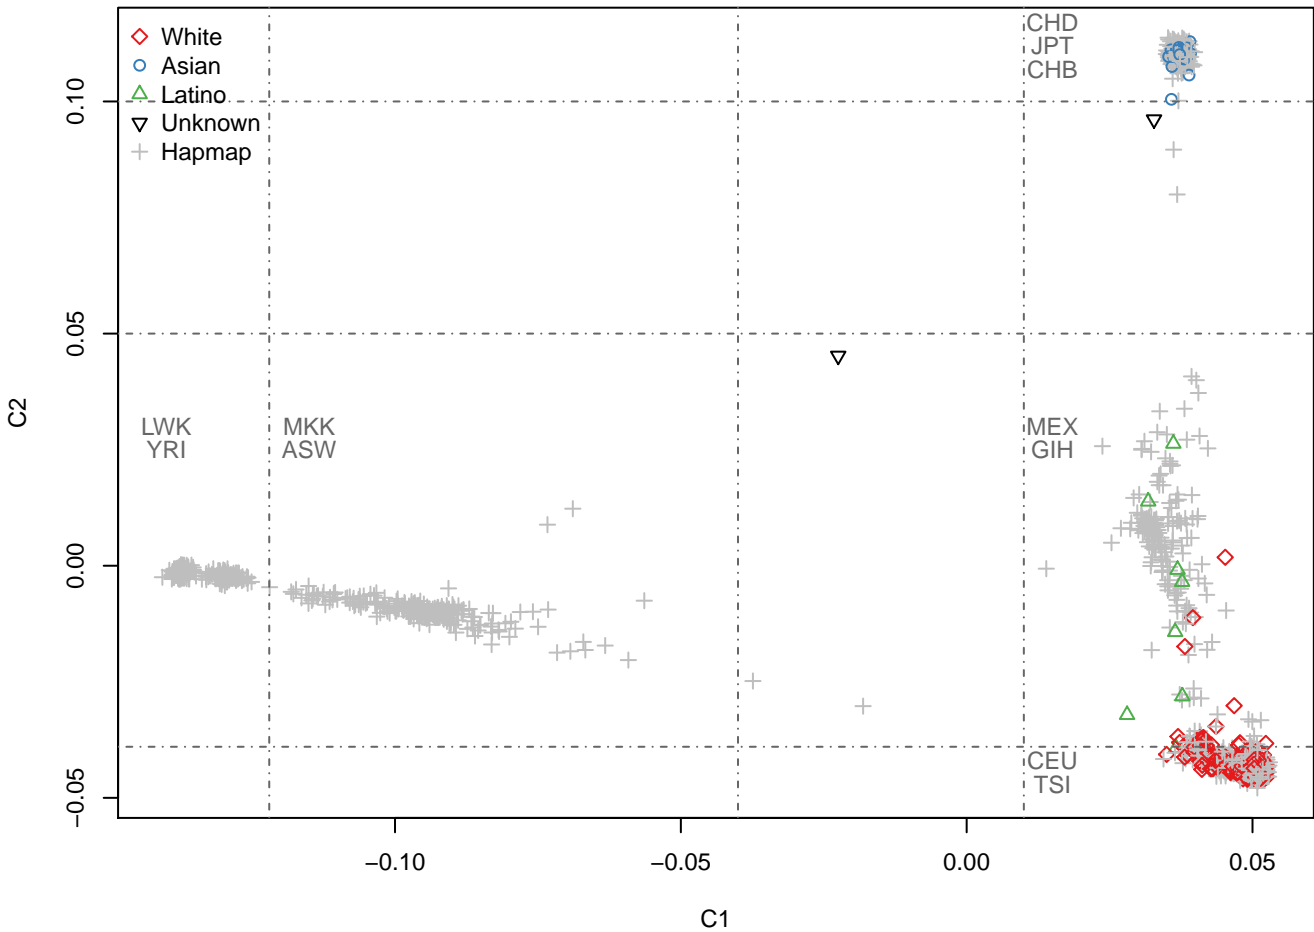

Supplement: pgen.1004211.s009.pdf [file pgen.1004211.s009.pdf]
