# Supplementary material for: An Epigenetic Signature in Peripheral Blood Associated with the Haplotype on 17q21.31, a Risk Factor for Neurodegenerative Tauopathy
Source: PLoS Genet. 2014 Mar 6;10(3):e1004211. doi: 10.1371/journal.pgen.1004211 (PMC3945475; doi:10.1371/journal.pgen.1004211)
Supplement: Table S7 — Methylation-QTL analysis for the 3 top DMPs, performed in the 2 datasets separately, in 226 individuals of European descent. Only significant (Bonferroni-adjusted p≤0.05) SNPs are presented. (XLSX) [file pgen.1004211.s018.xlsx]

## Sheet: table_S7
				R2 >= 0.8
				R2 > 0.5
					DMPs	cg22968622				cg17117718				cg19832721
					Dataset	#1		#2		#1		#2		#1		#2
	snp	chr	Coordinate	GeneSymbol	GeneLocation	R2	BONF	R2	BONF	R2	BONF	R2	BONF	R2	BONF	R2	BONF
1	rs440778	17	43686420	LOC644172 | MGC57346	INTERGENIC	0.9235	1.024e-55	0.8958	4.981e-42	0.5458	5.676e-14	0.7016	1.334e-20	0.5842	2.675e-16	0.719	1.578e-21
2	rs17585974	17	44249199	KIAA1267	CODING	0.9235	1.024e-55	0.9787	4.172e-74	0.5458	5.676e-14	0.6163	1.915e-15	0.5842	2.675e-16	0.6438	3.044e-17
3	rs2458182	17	43683802	LOC644172 | MGC57346	INTERGENIC	0.9235	1.024e-55	0.8926	1.638e-40	0.5458	5.676e-14	0.6995	2.711e-20	0.5842	2.675e-16	0.7098	2.803e-20
4	rs2732651	17	44345063	LOC100132570	INTRON	0.9235	1.024e-55	0.9787	4.172e-74	0.5458	5.676e-14	0.6163	1.915e-15	0.5842	2.675e-16	0.6438	3.044e-17
5	rs2463518	17	43656627	LOC100288229 | LOC644157	INTERGENIC	0.9235	1.024e-55	0.935	5.052e-51	0.5458	5.676e-14	0.5893	5.552e-14	0.5842	2.675e-16	0.6076	3.655e-15
6	rs2532332	17	44347727	LOC100132570 | LRRC37A	INTERGENIC	0.9235	1.024e-55	0.9787	4.172e-74	0.5458	5.676e-14	0.6163	1.915e-15	0.5842	2.675e-16	0.6438	3.044e-17
7	rs17662889	17	44249096	KIAA1267	CODING	0.9232	4.254e-55	0.9788	2.047e-72	0.5682	3.788e-15	0.6141	4.565e-15	0.5784	7.485e-16	0.6283	4.593e-16
8	rs2463524	17	44326245	LOC644253 | LOC644256	INTERGENIC	0.9232	4.254e-55	0.9345	1.332e-48	0.5682	3.788e-15	0.7064	3.878e-20	0.5784	7.485e-16	0.6984	4.264e-19
9	rs1724429	17	43662020	LOC100288229 | LOC644157	INTERGENIC	0.9222	1.078e-53	0.9821	1.713e-69	0.6247	4.561e-18	0.5955	3.838e-12	0.566	7.939e-15	0.5629	5.633e-11
10	rs2957297	17	44368212	LOC100132570 | LRRC37A	INTERGENIC	0.9222	1.078e-53	0.9808	4.322e-70	0.6247	4.561e-18	0.5783	1.241e-11	0.566	7.939e-15	0.5847	2.648e-12
11	rs2732674	17	44280697	KIAA1267 | LOC644253	INTERGENIC	0.9199	2.432e-52	0.9325	7.299e-49	0.7059	6.706e-23	0.6921	3.72e-19	0.605	5.792e-17	0.6972	4.763e-19
12	rs17665188	17	44357351	LOC100132570 | LRRC37A	INTERGENIC	0.8792	1.046e-44	0.8583	4.348e-36	0.7074	2.391e-24	0.8533	3.834e-34	0.5803	4.408e-16	0.6906	2.94e-20
13	rs2696557	17	44347218	LOC100132570 | LRRC37A	INTERGENIC	0.878	5.024e-44	0.8815	1.509e-39	0.7252	9.853e-26	0.876	3.567e-37	0.584	3.982e-16	0.6897	5.373e-20
14	rs2532329	17	44350090	LOC100132570 | LRRC37A	INTERGENIC	0.8774	2.232e-43	0.8809	6.174e-39	0.7239	2.521e-25	0.8757	1.188e-36	0.584	5.671e-16	0.6885	1.259e-19
15	rs1881193	17	44248769	KIAA1267	CODING	0.8561	1.051e-40	0.8364	6.555e-34	0.7842	3.873e-31	0.852	1.747e-34	0.5923	1.108e-16	0.6932	1.206e-20
16	rs2469933	17	44285531	KIAA1267 | LOC644253	INTERGENIC	0.8561	1.051e-40	0.8583	4.348e-36	0.7842	3.873e-31	0.8533	3.834e-34	0.5923	1.108e-16	0.6906	2.94e-20
17	rs2532316	17	44213712	KIAA1267	INTRON	0.8552	3.497e-40	0.8583	4.348e-36	0.8013	8.816e-33	0.8533	3.834e-34	0.5953	1.188e-16	0.6906	2.94e-20
18	rs1881194	17	44248814	KIAA1267	CODING	0.8552	3.497e-40	0.8583	4.348e-36	0.8013	8.816e-33	0.8533	3.834e-34	0.5953	1.188e-16	0.6906	2.94e-20
19	rs2696463	17	44286128	KIAA1267 | LOC644253	INTERGENIC	0.8552	3.497e-40	0.8829	1.451e-39	0.8013	8.816e-33	0.8818	1.039e-37	0.5953	1.188e-16	0.6883	1.309e-19
20	rs418891	17	43693538	LOC644172 | MGC57346	INTERGENIC	0.8543	1.148e-39	0.8815	1.509e-39	0.8006	2.109e-32	0.876	3.567e-37	0.5942	2.134e-16	0.6897	5.373e-20
21	rs2141299	17	44240986	KIAA1267	INTRON	0.8539	3.519e-39	0.8605	2.086e-34	0.8031	2.21e-32	0.8619	1.71e-33	0.6012	1.498e-16	0.6806	1.964e-18
22	rs2532253	17	44256296	KIAA1267 | LOC644253	INTERGENIC	0.8474	4.035e-39	0.8735	3.255e-38	0.5721	7.17e-15	0.6463	4.748e-17	0.5825	7.697e-16	0.6845	5.03e-19
23	rs2696464	17	44287310	KIAA1267 | LOC644253	INTERGENIC	0.8529	1.557e-38	0.8583	4.348e-36	0.7998	1.598e-31	0.8533	3.834e-34	0.5966	3.739e-16	0.6906	2.94e-20
24	rs2957316	17	44331214	LOC644253 | LOC644256	INTERGENIC	0.8291	3.528e-36	0.8364	6.555e-34	0.7875	3.228e-31	0.852	1.747e-34	0.5832	6.056e-16	0.6932	1.206e-20
25	rs16940674	17	43910507	CRHR1	CODING	0.824	6.552e-36	0.8364	6.555e-34	0.8016	3.296e-33	0.852	1.747e-34	0.5905	1.468e-16	0.6932	1.206e-20
26	rs16940665	17	43907896	CRHR1	CODING	0.824	6.552e-36	0.8364	6.555e-34	0.8016	3.296e-33	0.852	1.747e-34	0.5905	1.468e-16	0.6932	1.206e-20
27	rs1396862	17	43902997	CRHR1	INTRON	0.824	6.552e-36	0.8364	6.555e-34	0.8016	3.296e-33	0.852	1.747e-34	0.5905	1.468e-16	0.6932	1.206e-20
28	rs17763086	17	43905481	CRHR1	INTRON	0.824	6.552e-36	0.8364	6.555e-34	0.8016	3.296e-33	0.852	1.747e-34	0.5905	1.468e-16	0.6932	1.206e-20
29	rs17574604	17	44111613	KIAA1267	CODING	0.824	6.552e-36	0.8364	6.555e-34	0.8016	3.296e-33	0.852	1.747e-34	0.5905	1.468e-16	0.6932	1.206e-20
30	rs12150390	17	43896228	CRHR1	INTRON	0.824	6.552e-36	0.8364	6.555e-34	0.8016	3.296e-33	0.852	1.747e-34	0.5905	1.468e-16	0.6932	1.206e-20
31	rs17576165	17	44159849	KIAA1267	CODING	0.824	6.552e-36	0.8364	6.555e-34	0.8016	3.296e-33	0.852	1.747e-34	0.5905	1.468e-16	0.6932	1.206e-20
32	rs35833914	17	44110541	KIAA1267	CODING	0.824	6.552e-36	0.8364	6.555e-34	0.8016	3.296e-33	0.852	1.747e-34	0.5905	1.468e-16	0.6932	1.206e-20
33	rs36076725	17	44110532	KIAA1267	CODING	0.824	6.552e-36	0.8364	6.555e-34	0.8016	3.296e-33	0.852	1.747e-34	0.5905	1.468e-16	0.6932	1.206e-20
34	rs17574361	17	44108202	KIAA1267	UTR	0.824	6.552e-36	0.8364	6.555e-34	0.8016	3.296e-33	0.852	1.747e-34	0.5905	1.468e-16	0.6932	1.206e-20
35	rs241041	17	43713925	MGC57346	UTR	0.824	6.552e-36	0.8364	6.555e-34	0.8016	3.296e-33	0.852	1.747e-34	0.5905	1.468e-16	0.6932	1.206e-20
36	rs241039	17	43714673	MGC57346	UTR	0.824	6.552e-36	0.8357	1.765e-33	0.8016	3.296e-33	0.8513	5.097e-34	0.5905	1.468e-16	0.692	2.338e-20
37	rs2942168	17	43714850	MGC57346	UTR	0.824	6.552e-36	0.8364	6.555e-34	0.8016	3.296e-33	0.852	1.747e-34	0.5905	1.468e-16	0.6932	1.206e-20
38	rs2942167	17	43715018	MGC57346	UTR	0.824	6.552e-36	0.8364	6.555e-34	0.8016	3.296e-33	0.852	1.747e-34	0.5905	1.468e-16	0.6932	1.206e-20
39	rs7350928	17	44108100	KIAA1267	UTR	0.824	6.552e-36	0.8364	6.555e-34	0.8016	3.296e-33	0.852	1.747e-34	0.5905	1.468e-16	0.6932	1.206e-20
40	rs17574228	17	44104509	MAPT	UTR	0.824	6.552e-36	0.8364	6.555e-34	0.8016	3.296e-33	0.852	1.747e-34	0.5905	1.468e-16	0.6932	1.206e-20
41	rs2158257	17	44104343	MAPT	UTR	0.824	6.552e-36	0.8364	6.555e-34	0.8016	3.296e-33	0.852	1.747e-34	0.5905	1.468e-16	0.6932	1.206e-20
42	rs16940799	17	44102933	MAPT	UTR	0.824	6.552e-36	0.8364	6.555e-34	0.8016	3.296e-33	0.852	1.747e-34	0.5905	1.468e-16	0.6932	1.206e-20
43	rs17426064	17	43828698	C17orf69 | CRHR1	INTERGENIC	0.824	6.552e-36	0.8364	6.555e-34	0.8016	3.296e-33	0.852	1.747e-34	0.5905	1.468e-16	0.6932	1.206e-20
44	rs17334797	17	43825912	C17orf69 | CRHR1	INTERGENIC	0.824	6.552e-36	0.8364	6.555e-34	0.8016	3.296e-33	0.852	1.747e-34	0.5905	1.468e-16	0.6932	1.206e-20
45	rs17574040	17	44102865	MAPT	UTR	0.824	6.552e-36	0.8357	2.289e-33	0.8016	3.296e-33	0.8516	5.872e-34	0.5905	1.468e-16	0.6919	2.928e-20
46	rs1052587	17	44102604	MAPT	UTR	0.824	6.552e-36	0.8364	6.555e-34	0.8016	3.296e-33	0.852	1.747e-34	0.5905	1.468e-16	0.6932	1.206e-20
47	rs17573509	17	44081224	STH | MAPT	INTERGENIC	0.824	6.552e-36	0.8364	6.555e-34	0.8016	3.296e-33	0.852	1.747e-34	0.5905	1.468e-16	0.6932	1.206e-20
48	rs17652121	17	44073973	MAPT	CODING	0.824	6.552e-36	0.8357	2.289e-33	0.8016	3.296e-33	0.8516	5.872e-34	0.5905	1.468e-16	0.6919	2.928e-20
49	rs1078268	17	44075901	MAPT | STH	INTERGENIC	0.824	6.552e-36	0.8364	6.555e-34	0.8016	3.296e-33	0.852	1.747e-34	0.5905	1.468e-16	0.6932	1.206e-20
50	rs1052553	17	44073889	MAPT	CODING	0.824	6.552e-36	0.8357	2.289e-33	0.8016	3.296e-33	0.8516	5.872e-34	0.5905	1.468e-16	0.6919	2.928e-20
51	rs17573175	17	44071089	MAPT	INTRON	0.824	6.552e-36	0.8364	6.555e-34	0.8016	3.296e-33	0.852	1.747e-34	0.5905	1.468e-16	0.6932	1.206e-20
52	rs1052551	17	44068924	MAPT	CODING	0.824	6.552e-36	0.8364	6.555e-34	0.8016	3.296e-33	0.852	1.747e-34	0.5905	1.468e-16	0.6932	1.206e-20
53	rs10445338	17	44067682	MAPT	INTRON	0.824	6.552e-36	0.8364	6.555e-34	0.8016	3.296e-33	0.852	1.747e-34	0.5905	1.468e-16	0.6932	1.206e-20
54	rs10445337	17	44067400	MAPT	CODING	0.824	6.552e-36	0.8364	6.555e-34	0.8016	3.296e-33	0.852	1.747e-34	0.5905	1.468e-16	0.6932	1.206e-20
55	rs1800547	17	44051846	MAPT	INTRON	0.824	6.552e-36	0.8357	2.289e-33	0.8016	3.296e-33	0.8516	5.872e-34	0.5905	1.468e-16	0.6919	2.928e-20
56	rs17650901	17	44039691	MAPT	UTR	0.824	6.552e-36	0.8364	6.555e-34	0.8016	3.296e-33	0.852	1.747e-34	0.5905	1.468e-16	0.6932	1.206e-20
57	rs17770343	17	43970154	IMP5 | MAPT	INTERGENIC	0.824	6.552e-36	0.8364	6.555e-34	0.8016	3.296e-33	0.852	1.747e-34	0.5905	1.468e-16	0.6932	1.206e-20
58	rs12373142	17	43924200	IMP5	CODING	0.824	6.552e-36	0.8364	6.555e-34	0.8016	3.296e-33	0.852	1.747e-34	0.5905	1.468e-16	0.6932	1.206e-20
59	rs12373123	17	43924073	IMP5	CODING	0.824	6.552e-36	0.8364	6.555e-34	0.8016	3.296e-33	0.852	1.747e-34	0.5905	1.468e-16	0.6932	1.206e-20
60	rs12185235	17	43923703	IMP5	CODING	0.824	6.552e-36	0.8364	6.555e-34	0.8016	3.296e-33	0.852	1.747e-34	0.5905	1.468e-16	0.6932	1.206e-20
61	rs12185268	17	43923683	IMP5	CODING	0.824	6.552e-36	0.8364	6.555e-34	0.8016	3.296e-33	0.852	1.747e-34	0.5905	1.468e-16	0.6932	1.206e-20
62	rs878886	17	43912490	CRHR1	UTR	0.824	6.552e-36	0.8364	6.555e-34	0.8016	3.296e-33	0.852	1.747e-34	0.5905	1.468e-16	0.6932	1.206e-20
63	rs12185233	17	43923654	IMP5	CODING	0.824	6.552e-36	0.8364	6.555e-34	0.8016	3.296e-33	0.852	1.747e-34	0.5905	1.468e-16	0.6932	1.206e-20
64	rs17660464	17	44177993	KIAA1267	INTRON	0.824	6.552e-36	0.8364	6.555e-34	0.8016	3.296e-33	0.852	1.747e-34	0.5905	1.468e-16	0.6932	1.206e-20
65	rs17763596	17	43921210	LOC100128977	UTR	0.824	6.552e-36	0.8364	6.555e-34	0.8016	3.296e-33	0.852	1.747e-34	0.5905	1.468e-16	0.6932	1.206e-20
66	rs878887	17	43912582	CRHR1	UTR	0.824	6.552e-36	0.8364	6.555e-34	0.8016	3.296e-33	0.852	1.747e-34	0.5905	1.468e-16	0.6932	1.206e-20
67	rs10445364	17	43916356	CRHR1 | LOC100128977	INTERGENIC	0.824	6.552e-36	0.8364	6.555e-34	0.8016	3.296e-33	0.852	1.747e-34	0.5905	1.468e-16	0.6932	1.206e-20
68	rs878888	17	43912635	CRHR1	UTR	0.824	6.552e-36	0.8364	6.555e-34	0.8016	3.296e-33	0.852	1.747e-34	0.5905	1.468e-16	0.6932	1.206e-20
69	rs4525537	17	43912723	CRHR1	UTR	0.824	6.552e-36	0.8364	6.555e-34	0.8016	3.296e-33	0.852	1.747e-34	0.5905	1.468e-16	0.6932	1.206e-20
70	rs4640231	17	43912786	CRHR1	UTR	0.824	6.552e-36	0.8364	6.555e-34	0.8016	3.296e-33	0.852	1.747e-34	0.5905	1.468e-16	0.6932	1.206e-20
71	rs199533	17	44828931	NSF	CODING	0.8167	1.247e-35	0.8594	2.051e-36	0.6814	7.342e-23	0.7137	3.453e-21	0.5842	2.425e-16	0.5879	1.646e-14
72	rs11079725	17	43923934	IMP5	CODING	0.8261	1.335e-35	0.8364	6.555e-34	0.7977	2.199e-32	0.852	1.747e-34	0.5899	3.599e-16	0.6932	1.206e-20
73	rs1912151	17	43902944	CRHR1	INTRON	0.8225	2.492e-35	0.8363	2.263e-33	0.7999	1.184e-32	0.8526	4.168e-34	0.5869	3.717e-16	0.6906	3.839e-20
74	rs17651549	17	44061278	MAPT	CODING	0.8225	2.961e-35	0.8364	6.555e-34	0.8148	1.883e-34	0.852	1.747e-34	0.588	4.16e-16	0.6932	1.206e-20
75	rs17660132	17	44165803	KIAA1267	INTRON	0.8218	5.886e-35	0.8437	5.921e-33	0.7982	3.585e-32	0.8646	5.043e-35	0.5857	6.17e-16	0.6937	1.67e-19
76	rs17660595	17	44180954	KIAA1267	INTRON	0.8217	1.254e-34	0.8352	5.222e-33	0.8016	2.434e-32	0.8504	1.636e-33	0.5856	1.054e-15	0.6904	6.14e-20
77	rs1876828	17	43911525	CRHR1	INTRON	0.8205	2.386e-34	0.8356	6.962e-33	0.8005	4.705e-32	0.8523	1.13e-33	0.5935	3.744e-16	0.6895	8.478e-20
78	rs17691610	17	43970662	IMP5 | MAPT	INTERGENIC	0.8196	2.803e-34	0.8361	1.891e-31	0.7986	7.069e-32	0.8613	2.643e-33	0.5878	7.543e-16	0.6736	4.34e-18
79	rs365825	17	43705601	MGC57346	INTRON	0.8007	3.831e-34	0.8364	6.555e-34	0.7818	1.974e-31	0.852	1.747e-34	0.5714	2.193e-15	0.6932	1.206e-20
80	rs2532274	17	44247164	KIAA1267	INTRON	0.7878	4.03e-32	0.8583	4.348e-36	0.6667	2.809e-21	0.8533	3.834e-34	0.6322	6.331e-19	0.6906	2.94e-20
81	rs199528	17	44843136	WNT3	INTRON	0.7826	1.223e-31	0.8531	1.87e-35	0.6758	1.9e-22	0.7038	1.818e-20	0.565	3.436e-15	0.5831	2.959e-14
82	rs12373168	17	43924337	IMP5 | MAPT	INTERGENIC	0.7633	1.109e-30	0.8364	6.555e-34	0.7386	6.65e-28	0.852	1.747e-34	0.5464	3.215e-14	0.6932	1.206e-20
83	rs17660337	17	44169605	KIAA1267	INTRON	0.7761	3.964e-30	0.8352	2.432e-33	0.7664	3.035e-29	0.8577	8.723e-35	0.5741	9.646e-16	0.6908	3.325e-20
84	rs417968	17	43728376	C17orf69 | CRHR1	INTERGENIC	0.7153	5.548e-29	0.7494	1.323e-24	0.6931	7.432e-26	0.7725	6.978e-26	0.4886	7.116e-12	0.6422	3.001e-17
85	rs17690703	17	43925297	IMP5 | MAPT	INTERGENIC	0.76	1.148e-28	0.7126	2.11e-22	0.7381	5.185e-27	0.7386	4.53e-23	0.5236	5.103e-13	0.6053	6.927e-15
86	rs7215239	17	43767773	C17orf69 | CRHR1	INTERGENIC	0.7413	1.539e-28	0.7718	1.01e-26	0.7202	2.635e-26	0.7903	2.153e-27	0.5146	1.298e-12	0.6687	4.333e-19
87	rs1635291	17	43751913	C17orf69 | CRHR1	INTERGENIC	0.7214	3.67e-28	0.7718	1.01e-26	0.7034	8.456e-26	0.7903	2.153e-27	0.4983	5.267e-12	0.6687	4.333e-19
88	rs1724400	17	43755871	C17orf69 | CRHR1	INTERGENIC	0.7214	3.67e-28	0.7718	1.01e-26	0.7034	8.456e-26	0.7903	2.153e-27	0.4983	5.267e-12	0.6687	4.333e-19
89	rs415430	17	44859144	WNT3	INTRON	0.7314	1.243e-27	0.8278	7.785e-32	0.6345	3.864e-20	0.6841	6.151e-19	0.5301	2.131e-13	0.5532	1.191e-12
90	rs199454	17	44800110	NSF	INTRON	0.7023	1.144e-25	0.7861	1.985e-27	0.5471	6.937e-15	0.6823	5.456e-19	0.4546	5.761e-10	0.5865	1.353e-14
91	rs7224296	17	44800046	NSF	INTRON	0.6249	1.555e-21	0.6286	2.38e-16	0.4994	2.765e-13	0.6526	3.608e-18	0.4449	5.77e-10	0.5149	2.076e-11
92	rs199501	17	44862613	WNT3	INTRON	0.6376	4.043e-21	0.7615	5.555e-25	0.5389	9.018e-15	0.6204	2.582e-15	0.4485	7.795e-10	0.5414	2.551e-12
93	rs12947718	17	43493101	ARHGAP27	INTRON	0.6427	6.12e-20	0.6547	2.213e-18	0.6586	1.356e-20	0.768	7.756e-26	0.4904	1.452e-11	0.5643	4.528e-13
94	rs11012	17	43513441	PLEKHM1	UTR	0.6427	6.12e-20	0.6547	2.213e-18	0.6586	1.356e-20	0.768	7.756e-26	0.4904	1.452e-11	0.5643	4.528e-13
95	rs17631303	17	43516402	PLEKHM1	INTRON	0.6427	6.12e-20	0.6547	2.213e-18	0.6586	1.356e-20	0.768	7.756e-26	0.4904	1.452e-11	0.5643	4.528e-13
96	rs17631676	17	43549526	PLEKHM1	INTRON	0.6427	6.12e-20	0.6547	2.213e-18	0.6586	1.356e-20	0.768	7.756e-26	0.4904	1.452e-11	0.5643	4.528e-13
97	rs199523	17	44848517	WNT3	INTRON	0.6176	8.884e-20	0.7615	5.555e-25	0.5216	8.223e-14	0.6204	2.582e-15	0.423	8.749e-09	0.5414	2.551e-12
98	rs199524	17	44848438	WNT3	INTRON	0.6176	8.884e-20	0.7615	5.555e-25	0.5216	8.223e-14	0.6204	2.582e-15	0.423	8.749e-09	0.5414	2.551e-12
99	rs1879581	17	43545893	PLEKHM1	CODING	0.6413	1.452e-19	0.6547	2.213e-18	0.6617	1.488e-20	0.768	7.756e-26	0.4886	2.905e-11	0.5643	4.528e-13
100	rs12946900	17	43512206	SH3D20 | PLEKHM1	INTERGENIC	0.6385	2.05e-19	0.6698	1.042e-18	0.6545	5.046e-20	0.7878	6.588e-27	0.4844	4.323e-11	0.5511	5.248e-12
101	rs8078336	17	45097337	LOC644397	INTRON	0.6516	2.785e-19	0.6099	1.687e-12	0.4596	8.382e-10	0.5278	2.68e-09	0.3657	4.377e-06	0.4666	7.905e-07
102	rs2074404	17	44865439	WNT3	INTRON	0.5229	3.036e-14	0.6244	1.52e-15	0.414	4.383e-09	0.5816	7.756e-14	0.4367	1.959e-09	0.4999	2.399e-10
103	rs7210728	17	43968415	IMP5 | MAPT	INTERGENIC	0.4216	1.679e-08	0.568	5.793e-13	0.3852	4.12e-07	0.5866	3.356e-13	0.2575	0.01538	0.5361	3.758e-12
104	rs8067056	17	44083948	STH | MAPT	INTERGENIC	0.4102	5.266e-08	0.4337	2.147e-07	0.3898	3.668e-07	0.4819	9.547e-09	0.3204	9.197e-05	0.4068	1.553e-06
105	rs7225002	17	44189067	KIAA1267	INTRON	0.3617	3.827e-06	0.4153	2.182e-06	0.3309	6.502e-05	0.4579	5.934e-08	0.3639	3.377e-06	0.3134	0.002994
106	rs754593	17	44054696	MAPT	INTRON	0.3543	1.685e-05	0.3072	0.003003	0.3175	0.000223	0.3098	0.003798	0.3459	1.593e-05	0.3221	0.001699
